# Supplementary material
Source: Copernicus journal article supplement (doi:10.5194/hess-30-2059-2026)
Supplement: Supplementary file 1 [file hess-30-2059-2026-supplement.pdf]

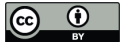

*Supplement of*

## **Exploring controls on solute export mechanisms in anthropogenically impacted catchments in Southern Germany in climatically different periods**

**Sofia Frietsch and Tobias Schuetz**

*Correspondence to:* Sofia Frietsch (frietsch@uni-trier.de)

The copyright of individual parts of the supplement might differ from the article licence.

**Table S1: Overview about catchment characteristics including the categories Hydrological ( $Q_{\text{mean}}$ ,  $Q_{\text{median}}$ ,  $\log(Q_{\text{mean}})$ ,  $q$  – discharge per unit catchment area), Topography (altitude,  $A$  – catchment area), and soil characteristics (soil moisture). Soil moisture is calculated for Period 1 (P1), Period 2 (P2) and the whole observation period (all).**

| stream        | $Q_{\text{median}} [\text{m}^3 \text{ s}^{-1}]$ | $Q_{\text{mean}} [\text{m}^3 \text{ s}^{-1}]$ | $\log(Q_{\text{mean}}) [\text{m}^3 \text{ s}^{-1}]$ | $A [\text{km}^2]$ | $q [\text{L s}^{-1} \text{ km}^{-2}]$ | altitude [m.a.s.l.] | soil moisture [% nFK] |        |        |
|---------------|-------------------------------------------------|-----------------------------------------------|-----------------------------------------------------|-------------------|---------------------------------------|---------------------|-----------------------|--------|--------|
|               |                                                 |                                               |                                                     |                   |                                       |                     | P1                    | P2     | all    |
| Aisch         | 3.7                                             | 5.8                                           | 0.6                                                 | 991               | 5.8                                   | 268                 | 84.50                 | 76.17  | 81.67  |
| Kammel        | 2.2                                             | 2.7                                           | 0.4                                                 | 251               | 10.6                                  | 548                 | 93.67                 | 88.58  | 91.92  |
| Loisach       | 18.9                                            | 21.6                                          | 1.3                                                 | 638               | 4.2                                   | 827                 | 102.83                | 101.17 | 102.25 |
| Naab          | 35.6                                            | 49.7                                          | 1.6                                                 | 5434              | 9                                     | 449                 | 91.58                 | 85.58  | 89.58  |
| Schwarzach    | 6.1                                             | 8.5                                           | 0.8                                                 | 820               | 10.2                                  | 553                 | 93.75                 | 88.58  | 92.00  |
| Tiroler Achen | 27.9                                            | 35.8                                          | 1.5                                                 | 945               | 37.8                                  | 613                 | 100.17                | 97.58  | 99.25  |
| Vils          | 7.4                                             | 11                                            | 1                                                   | 1440              | 7.1                                   | 357                 | 91.92                 | 86.67  | 90.08  |
| Alf           | 4                                               | 1.3                                           | 0.1                                                 | 138               | 45.5                                  | 433                 | 90.83                 | 86.17  | 89.25  |
| Alsensz       | 2.3                                             | 1.7                                           | 0.1                                                 | 316               | 9.4                                   | 351                 | 89.92                 | 83.58  | 87.75  |
| Appelbach     | 10.7                                            | 0.5                                           | -0.2                                                | 170               | 84.2                                  | 148                 | 84.75                 | 77.17  | 82.08  |
| Erlenbach     | 19.4                                            | 0.5                                           | -0.2                                                | 97                | 240.5                                 | 173                 | 86.17                 | 78.17  | 83.42  |
| Glan          | 19.3                                            | 10.1                                          | 0.8                                                 | 1088              | 21.2                                  | 335                 | 88.75                 | 82.08  | 86.42  |
| Hornbach      | 18.2                                            | 4.5                                           | 0.6                                                 | 425               | 50.7                                  | 290                 | 88.83                 | 81.83  | 86.42  |
| Nahe          | 20.1                                            | 29.8                                          | 1.3                                                 | 4039              | 7.2                                   | 363                 | 90.17                 | 84.08  | 88.08  |
| Nette         | 38                                              | 2                                             | 0.2                                                 | 369               | 147.2                                 | 441                 | 91.50                 | 86.50  | 89.75  |
| Pfrimm        | 32.5                                            | 0.8                                           | -0.1                                                | 226               | 198.9                                 | 395                 | 89.17                 | 82.67  | 86.92  |
| Queich        | 37.6                                            | 1.1                                           | 0                                                   | 268               | 189                                   | 187                 | 86.67                 | 79.00  | 84.08  |
| Ruwer         | 36.5                                            | 2.7                                           | 0.2                                                 | 222               | 222.7                                 | 412                 | 91.00                 | 86.25  | 89.33  |
| Selz          | 5.8                                             | 0.5                                           | -0.3                                                | 363               | 27.5                                  | 226                 | 86.58                 | 79.33  | 84.08  |
| Simmerbach    | 6.9                                             | 2.3                                           | 0.1                                                 | 362               | 25.1                                  | 422                 | 89.83                 | 83.92  | 87.75  |
| Speyerbach    | 6.3                                             | 1.8                                           | 0.2                                                 | 312               | 29.3                                  | 293                 | 88.58                 | 81.58  | 86.17  |
| Wiesbach      | 27.5                                            | 0.4                                           | -0.2                                                | 197               | 177.6                                 | 187                 | 85.08                 | 77.58  | 82.50  |
| Hahnenbach    | 27.3                                            | 1.7                                           | 0.1                                                 | 255               | 144.8                                 | 345                 | 89.42                 | 83.50  | 87.33  |
| Aar           | 27.9                                            | 1.4                                           | 0                                                   | 243               | 144.1                                 | 254                 | 86.92                 | 80.00  | 84.50  |
| Doersbach     | 28.7                                            | 0.7                                           | -0.1                                                | 113               | 324.9                                 | 343                 | 88.33                 | 82.00  | 86.17  |
| Enz           | 6.7                                             | 1.2                                           | 0.1                                                 | 101               | 115.4                                 | 525                 | 91.92                 | 89.00  | 90.92  |
| Schwarzbach   | 8.1                                             | 4.6                                           | 0.6                                                 | 530               | 20.2                                  | 460                 | 91.25                 | 84.83  | 89.00  |
| Brigach       | 8.3                                             | 1.9                                           | 0.1                                                 | 101               | 115.1                                 | 835                 | 99.33                 | 94.58  | 97.67  |
| Donau         | 1.6                                             | 9                                             | 0.7                                                 | 827               | 4.6                                   | 827                 | 99.50                 | 94.58  | 97.83  |
| Eger          | 0.8                                             | 1                                             | 0                                                   | 107               | 12.8                                  | 514                 | 92.00                 | 86.08  | 90.00  |
| Erms          | 0.4                                             | 3.2                                           | 0.4                                                 | 159               | 3.4                                   | 393                 | 91.50                 | 85.17  | 89.33  |
| Jagst         | 0.5                                             | 9.6                                           | 0.7                                                 | 1030              | 2.7                                   | 508                 | 91.50                 | 85.33  | 89.33  |
| Neckar        | 3.8                                             | 4.9                                           | 0.5                                                 | 452               | 15.5                                  | 743                 | 97.50                 | 92.25  | 95.75  |
| Rems          | 7                                               | 6.7                                           | 0.7                                                 | 569               | 31.9                                  | 339                 | 88.75                 | 81.83  | 86.33  |
| Schutter      | 1                                               | 0.6                                           | -0.2                                                | 49                | 28.5                                  | 327                 | 92.00                 | 85.17  | 89.67  |
| Tauber        | 0.6                                             | 8.9                                           | 0.8                                                 | 1584              | 0.5                                   | 318                 | 87.08                 | 79.50  | 84.50  |
| Fils          | 0.8                                             | 9.4                                           | 0.8                                                 | 696               | 2                                     | 457                 | 92.50                 | 86.58  | 90.42  |
| Kocher        | 0.8                                             | 22.3                                          | 1.2                                                 | 1932              | 0.9                                   | 442                 | 91.00                 | 84.58  | 88.75  |
| Wolfegger Ach | 0.5                                             | 3                                             | 0.4                                                 | 164               | 3.6                                   | 632                 | 97.50                 | 93.00  | 95.92  |
| Breg          | 0.8                                             | 5.6                                           | 0.5                                                 | 291               | 6.8                                   | 827                 | 99.50                 | 94.58  | 97.83  |

**Table S2: Overview about catchment characteristics including the categories Land use (forest, pastures, arable land, urban area) and Geology (sediments, loess sediments, crystalline rock, sandstone, clay rock). Share of land use (%) is calculated for the year 2006 (representing Period 1) and the year 2018 (representing Period 2).**

| stream        | carbonate rock [%] | sediments [%] | loess sedi-ments [%] | crystalline rock [%] | sandstone [%] | clay rock [%] | forest [%] |      | pastures [%] |      | arable land [%] |      | urban area [%] |      |
|---------------|--------------------|---------------|----------------------|----------------------|---------------|---------------|------------|------|--------------|------|-----------------|------|----------------|------|
|               |                    |               |                      |                      |               |               | 2006       | 2018 | 2006         | 2018 | 2006            | 2018 | 2006           | 2018 |
| Aisch         | 0                  | 0             | 2                    | 0                    | 45            | 53            | 34         | 21   | 7            | 26   | 56              | 48   | 3              | 4    |
| Kammel        | 0                  | 4             | 92                   | 0                    | 0             | 0             | 36         | 34   | 27           | 32   | 32              | 28   | 5              | 6    |
| Loisach       | 78                 | 1             | 0                    | 0                    | 0             | 7             | 75         | 50   | 13           | 18   | 6               | 0    | 5              | 4    |
| Naab          | 15                 | 4             | 4                    | 40                   | 33            | 5             | 46         | 45   | 9            | 18   | 41              | 30   | 4              | 5    |
| Schwarzach    | 0                  | 0             | 0                    | 100                  | 0             | 0             | 41         | 40   | 13           | 29   | 44              | 28   | 2              | 3    |
| Tiroler Achen | 91                 | 9             | 0                    | 0                    | 0             | 0             | 83         | 69   | 14           | 17   | 1               | 0    | 2              | 3    |
| Vils          | 0                  | 0             | 100                  | 0                    | 0             | 0             | 18         | 18   | 0            | 0    | 78              | 80   | 4              | 2    |
| Alf           | 0                  | 0             | 0                    | 0                    | 0             | 100           | 36         | 18   | 22           | 56   | 40              | 22   | 3              | 4    |
| Alsenz        | 0                  | 0             | 0                    | 10                   | 90            | 0             | 32         | 9    | 5            | 51   | 59              | 34   | 4              | 5    |
| Appelbach     | 0                  | 1             | 50                   | 12                   | 37            | 0             | 19         | 3    | 0            | 28   | 76              | 63   | 5              | 6    |
| Erlenbach     | 0                  | 23            | 51                   | 0                    | 26            | 0             | 31         | 25   | 8            | 15   | 55              | 51   | 6              | 9    |
| Glan          | 0                  | 0             | 0                    | 8                    | 86            | 2             | 36         | 14   | 15           | 54   | 40              | 20   | 9              | 11   |
| Hornbach      | 3                  | 0             | 0                    | 0                    | 10            | 87            | 24         | 3    | 10           | 50   | 57              | 34   | 9              | 13   |
| Nahe          | 0                  | 0             | 6                    | 9                    | 53            | 30            | 39         | 14   | 11           | 49   | 44              | 28   | 6              | 8    |
| Nette         | 0                  | 0             | 1                    | 58                   | 0             | 40            | 32         | 14   | 7            | 34   | 51              | 39   | 10             | 12   |
| Pfrimm        | 23                 | 10            | 20                   | 0                    | 47            | 0             | 20         | 4    | 2            | 25   | 73              | 63   | 5              | 8    |
| Queich        | 0                  | 19            | 12                   | 0                    | 68            | 0             | 68         | 46   | 8            | 33   | 17              | 12   | 7              | 9    |
| Ruwer         | 0                  | 0             | 0                    | 0                    | 1             | 99            | 57         | 34   | 14           | 49   | 26              | 13   | 3              | 4    |
| Selz          | 0                  | 0             | 98                   | 0                    | 2             | 0             | 1          | 0    | 0            | 2    | 91              | 89   | 8              | 9    |
| Simmerbach    | 0                  | 0             | 0                    | 0                    | 14            | 86            | 39         | 22   | 14           | 38   | 44              | 36   | 2              | 4    |
| Speyerbach    | 0                  | 3             | 0                    | 0                    | 97            | 0             | 95         | 77   | 0            | 20   | 2               | 0    | 3              | 3    |
| Wiesbach      | 0                  | 0             | 64                   | 10                   | 26            | 0             | 20         | 2    | 0            | 21   | 74              | 70   | 5              | 7    |
| Hahnenbach    | 0                  | 0             | 0                    | 0                    | 0             | 100           | 45         | 25   | 15           | 40   | 36              | 30   | 4              | 5    |
| Aar           | 0                  | 0             | 0                    | 0                    | 0             | 100           | 49         | 7    | 5            | 56   | 44              | 33   | 2              | 4    |
| Doersbach     | 0                  | 0             | 0                    | 0                    | 0             | 100           | 42         | 10   | 10           | 49   | 47              | 38   | 2              | 3    |
| Enz           | 0                  | 0             | 0                    | 0                    | 4             | 96            | 34         | 14   | 29           | 58   | 36              | 26   | 1              | 2    |
| Schwarzbach   | 0                  | 0             | 0                    | 0                    | 65            | 35            | 61         | 32   | 5            | 46   | 27              | 14   | 7              | 8    |
| Brigach       | 0                  | 0             | 8                    | 59                   | 33            | 0             | 52         | 54   | 31           | 32   | 4               | 0    | 13             | 13   |
| Donau         | 29                 | 0             | 5                    | 28                   | 14            | 24            | 48         | 42   | 20           | 34   | 25              | 15   | 7              | 8    |
| Eger          | 23                 | 0             | 5                    | 0                    | 1             | 71            | 23         | 16   | 15           | 25   | 56              | 52   | 6              | 7    |
| Erms          | 2                  | 98            | 0                    | 0                    | 0             | 0             | 33         | 0    | 2            | 41   | 48              | 40   | 16             | 19   |
| Jagst         | 39                 | 0             | 31                   | 0                    | 0             | 31            | 29         | 15   | 16           | 37   | 52              | 43   | 4              | 5    |
| Neckar        | 25                 | 0             | 21                   | 0                    | 16            | 38            | 34         | 34   | 14           | 32   | 41              | 20   | 11             | 13   |
| Rems          | 50                 | 0             | 3                    | 0                    | 0             | 46            | 38         | 20   | 12           | 38   | 35              | 26   | 14             | 16   |
| Schutter      | 0                  | 0             | 0                    | 72                   | 28            | 0             | 68         | 56   | 24           | 43   | 9               | 1    | 0              | 0    |
| Tauber        | 66                 | 0             | 24                   | 0                    | 2             | 8             | 20         | 8    | 3            | 28   | 74              | 84   | 3              | 5    |
| Fils          | 59                 | 0             | 0                    | 0                    | 0             | 41            | 36         | 6    | 13           | 55   | 40              | 28   | 12             | 12   |
| Kocher        | 40                 | 0             | 27                   | 0                    | 0             | 33            | 37         | 23   | 14           | 36   | 43              | 34   | 6              | 7    |
| Wolfegger Ach | 0                  | 100           | 0                    | 0                    | 0             | 0             | 34         | 27   | 52           | 60   | 10              | 6    | 3              | 4    |
| Breg          | 12                 | 0             | 2                    | 59                   | 20            | 8             | 63         | 63   | 20           | 25   | 12              | 7    | 4              | 4    |

**Table S3: Overview about catchment climatic characteristics including precipitation (P), evapotranspiration (ET), potential evapotranspiration (PET), evaporative index (ET/P), and aridity index (PET/P) calculated for Period 1 (P1), Period 2 (P2) and the whole observation period (all).**

| stream        | P [mm] |        |        | ET [mm] |       |       | PET [mm] |       |       | ET/P [-] |     |     | PET/P [-] |     |     | dMI [mm °C <sup>-1</sup> ] |      |      |
|---------------|--------|--------|--------|---------|-------|-------|----------|-------|-------|----------|-----|-----|-----------|-----|-----|----------------------------|------|------|
|               | P1     | P2     | all    | P1      | P2    | all   | P2       | P1    | all   | P1       | P2  | all | P1        | P2  | all | P1                         | P2   | all  |
| Aisch         | 679    | 597.6  | 657.2  | 450.3   | 462   | 454.3 | 724.6    | 602.4 | 644.4 | 0.7      | 0.8 | 0.7 | 0.9       | 1.2 | 1   | 2.84                       | 2.22 | 2.68 |
| Kammel        | 915.8  | 849.9  | 898.2  | 483.3   | 523.9 | 497.3 | 688.3    | 583.5 | 619.5 | 0.5      | 0.6 | 0.6 | 0.6       | 0.8 | 0.7 | 3.89                       | 3.33 | 3.74 |
| Loisach       | 1371.9 | 1297.6 | 1352   | 498.7   | 572   | 523.9 | 625.4    | 534.5 | 565.7 | 0.4      | 0.4 | 0.4 | 0.4       | 0.5 | 0.4 | 7.04                       | 6.12 | 6.79 |
| Naab          | 833.3  | 706.9  | 799.4  | 456.3   | 485.6 | 466.4 | 669.5    | 564.6 | 600.7 | 0.6      | 0.7 | 0.6 | 0.7       | 1   | 0.8 | 4.11                       | 2.98 | 3.80 |
| Schwarzach    | 901.2  | 798.5  | 873.7  | 450.1   | 484.7 | 462   | 644.9    | 544.5 | 579   | 0.5      | 0.6 | 0.5 | 0.6       | 0.8 | 0.7 | 4.78                       | 3.58 | 4.45 |
| TirolerAchen  | 1623.6 | 1521.1 | 1596.1 | 498.6   | 568.9 | 522.8 | 662.5    | 558.7 | 594.4 | 0.3      | 0.4 | 0.3 | 0.3       | 0.4 | 0.4 | 8.43                       | 7.28 | 8.12 |
| Vils          | 889.4  | 792.6  | 863.4  | 484.1   | 525.5 | 498.3 | 701.6    | 599.6 | 634.6 | 0.5      | 0.7 | 0.6 | 0.7       | 0.9 | 0.7 | 4.18                       | 3.23 | 3.93 |
| Alf           | 903    | 786.2  | 871.6  | 440     | 452.7 | 444.4 | 657.7    | 560.7 | 594.1 | 0.5      | 0.6 | 0.5 | 0.6       | 0.8 | 0.7 | 4.33                       | 3.36 | 4.07 |
| Alsenz        | 739.1  | 714.6  | 732.5  | 450     | 472.4 | 457.7 | 695.2    | 578.5 | 618.6 | 0.6      | 0.7 | 0.6 | 0.8       | 1   | 0.9 | 3.15                       | 2.76 | 3.04 |
| Appelbach     | 543.3  | 483.2  | 527.1  | 459.1   | 475.2 | 464.6 | 759.2    | 625.1 | 671.2 | 0.9      | 1   | 0.9 | 1.2       | 1.6 | 1.3 | 1.88                       | 1.48 | 1.77 |
| Erlenbach     | 783.8  | 731.7  | 769.8  | 472.8   | 497.1 | 481.2 | 772.4    | 632.7 | 680.7 | 0.6      | 0.7 | 0.6 | 0.8       | 1.1 | 0.9 | 3.11                       | 2.60 | 2.98 |
| Glan          | 847.7  | 784.8  | 830.8  | 461.1   | 482.2 | 468.3 | 723.7    | 600.4 | 642.8 | 0.5      | 0.6 | 0.6 | 0.7       | 0.9 | 0.8 | 3.68                       | 3.11 | 3.53 |
| Hornbach      | 905.3  | 809.1  | 879.5  | 469.4   | 493.7 | 477.7 | 737.9    | 609.9 | 653.9 | 0.5      | 0.6 | 0.5 | 0.7       | 0.9 | 0.7 | 3.99                       | 3.16 | 3.77 |
| Nahe          | 851.9  | 794.2  | 836.4  | 450.2   | 470.3 | 457.1 | 691.1    | 577.8 | 616.7 | 0.5      | 0.6 | 0.6 | 0.7       | 0.9 | 0.7 | 3.86                       | 3.28 | 3.70 |
| Nette         | 852.5  | 765.1  | 829    | 433.4   | 445.9 | 437.7 | 642.7    | 548.7 | 581   | 0.5      | 0.6 | 0.5 | 0.7       | 0.9 | 0.7 | 3.98                       | 3.26 | 3.78 |
| Pfrimm        | 705.8  | 666    | 695.1  | 448.4   | 470   | 455.8 | 700.2    | 581.6 | 622.4 | 0.7      | 0.8 | 0.7 | 0.9       | 1.2 | 1   | 3.08                       | 2.61 | 2.96 |
| Queich        | 803.9  | 795.2  | 801.6  | 469.9   | 493.7 | 478.1 | 760.3    | 624.3 | 671.1 | 0.6      | 0.6 | 0.6 | 0.8       | 1   | 0.8 | 3.28                       | 2.99 | 3.20 |
| Ruwer         | 996.3  | 910    | 973.2  | 454.1   | 471.8 | 460.2 | 681.6    | 576.7 | 612.7 | 0.5      | 0.5 | 0.5 | 0.6       | 0.8 | 0.6 | 4.63                       | 3.96 | 4.45 |
| Selz          | 636.6  | 576.1  | 620.4  | 450.1   | 468.4 | 456.4 | 729.1    | 601.7 | 645.5 | 0.7      | 0.8 | 0.7 | 1         | 1.3 | 1   | 2.48                       | 2.02 | 2.36 |
| Simmerbach    | 697.2  | 613.1  | 674.6  | 442.6   | 459.3 | 448.3 | 681      | 571.7 | 609.3 | 0.6      | 0.8 | 0.7 | 0.8       | 1.1 | 0.9 | 2.93                       | 2.32 | 2.77 |
| Speyerbach    | 815.5  | 718.6  | 789.5  | 459.7   | 483.1 | 467.7 | 725      | 599.1 | 642.4 | 0.6      | 0.7 | 0.6 | 0.7       | 1   | 0.8 | 3.48                       | 2.76 | 3.28 |
| Wiesbach      | 540    | 491.5  | 527    | 455.7   | 471.9 | 461.3 | 750.9    | 618.6 | 664.1 | 0.9      | 1   | 0.9 | 1.2       | 1.5 | 1.3 | 1.89                       | 1.57 | 1.81 |
| Hahnenbach    | 768.2  | 655.8  | 738    | 446.2   | 462.6 | 451.8 | 691.2    | 578.8 | 617.5 | 0.6      | 0.7 | 0.6 | 0.8       | 1.1 | 0.8 | 3.36                       | 2.54 | 3.14 |
| Aar           | 645.3  | 554.9  | 621.1  | 441.7   | 457.3 | 447.1 | 709.6    | 589.9 | 631   | 0.7      | 0.8 | 0.7 | 0.9       | 1.3 | 1   | 2.58                       | 1.97 | 2.42 |
| Doersbach     | 739.1  | 640.9  | 712.7  | 439.4   | 455.1 | 444.8 | 690.5    | 577.4 | 616.3 | 0.6      | 0.7 | 0.6 | 0.8       | 1.1 | 0.9 | 3.15                       | 2.45 | 2.96 |
| Enz           | 930.8  | 767.8  | 887.1  | 442     | 451.4 | 445.2 | 635.8    | 553.3 | 581.7 | 0.5      | 0.6 | 0.5 | 0.6       | 0.8 | 0.7 | 4.50                       | 3.24 | 4.16 |
| Schwarzbach   | 958.8  | 866.7  | 934.1  | 457.7   | 484.2 | 466.8 | 694.5    | 578.7 | 618.5 | 0.5      | 0.6 | 0.5 | 0.6       | 0.8 | 0.7 | 4.53                       | 3.68 | 4.31 |
| Brigach       | 1454.8 | 1364.7 | 1430.6 | 457.9   | 509.5 | 475.6 | 623.6    | 518.1 | 554.4 | 0.3      | 0.4 | 0.3 | 0.4       | 0.5 | 0.4 | 8.32                       | 7.22 | 8.02 |
| Donau         | 1229.6 | 1169.6 | 1213.5 | 463.6   | 518.5 | 482.4 | 631.6    | 521.6 | 559.4 | 0.4      | 0.5 | 0.4 | 0.5       | 0.6 | 0.5 | 6.97                       | 6.26 | 6.78 |
| Eger          | 872.4  | 764.8  | 843.5  | 461     | 492.7 | 471.9 | 677.1    | 569.9 | 606.7 | 0.5      | 0.6 | 0.6 | 0.7       | 0.9 | 0.7 | 4.10                       | 3.13 | 3.84 |
| Erms          | 903    | 807.1  | 877.3  | 472.3   | 508.6 | 484.8 | 708.9    | 591.1 | 631.6 | 0.5      | 0.6 | 0.6 | 0.7       | 0.9 | 0.7 | 3.74                       | 2.98 | 3.53 |
| Jagst         | 878.1  | 770.7  | 849.3  | 459     | 489.4 | 469.5 | 681.1    | 571.4 | 609.1 | 0.5      | 0.6 | 0.6 | 0.7       | 0.9 | 0.7 | 4.11                       | 3.21 | 3.87 |
| Neckar        | 972.5  | 897.6  | 952.4  | 465.9   | 516.6 | 483.4 | 651.9    | 540.4 | 578.7 | 0.5      | 0.6 | 0.5 | 0.6       | 0.7 | 0.6 | 4.94                       | 4.10 | 4.72 |
| Rems          | 929.4  | 870.6  | 913.6  | 471.9   | 500   | 481.6 | 728.2    | 606.9 | 648.6 | 0.5      | 0.6 | 0.5 | 0.7       | 0.8 | 0.7 | 3.93                       | 3.41 | 3.79 |
| Schutter      | 1213.3 | 1114.9 | 1186.9 | 481.3   | 526   | 496.7 | 739.7    | 601.6 | 649.1 | 0.4      | 0.5 | 0.4 | 0.5       | 0.7 | 0.6 | 5.18                       | 4.56 | 5.01 |
| Tauber        | 721.8  | 636.3  | 698.9  | 452.5   | 473.8 | 459.8 | 717.3    | 592.7 | 635.5 | 0.6      | 0.8 | 0.7 | 0.8       | 1.1 | 0.9 | 3.06                       | 2.38 | 2.88 |
| Fils          | 1052.3 | 931.1  | 1019.8 | 466.7   | 502   | 478.9 | 687.1    | 576.4 | 614.5 | 0.5      | 0.6 | 0.5 | 0.6       | 0.8 | 0.6 | 4.83                       | 3.99 | 4.60 |
| Kocher        | 929.6  | 831.6  | 903.3  | 460.4   | 490.3 | 470.7 | 690.8    | 578   | 616.8 | 0.5      | 0.6 | 0.5 | 0.6       | 0.8 | 0.7 | 4.29                       | 3.52 | 4.08 |
| Wolfegger Ach | 1242   | 1052.6 | 1191.2 | 490.8   | 547.5 | 510.3 | 673.9    | 566.3 | 603.3 | 0.4      | 0.5 | 0.4 | 0.5       | 0.6 | 0.5 | 5.93                       | 4.51 | 5.54 |
| Breg          | 1229.6 | 1169.6 | 1213.5 | 463.6   | 518.5 | 482.4 | 631.6    | 521.6 | 559.4 | 0.4      | 0.5 | 0.4 | 0.5       | 0.6 | 0.5 | 6.97                       | 6.26 | 6.78 |

**Table S4: Overview about general SEM pattern for NH<sub>4</sub>-N, SRP, TP, TOC, NO<sub>3</sub>-N, Ca<sup>2+</sup> and Mg<sup>2+</sup>. Data comprises CV/cCV values (CV) and computed cQ-slopes (cQ) for the whole observation time attributed to each stream.**

| Stream        | NH <sub>4</sub> -N |       | SRP  |       | TP   |       | TOC  |       | NO <sub>3</sub> -N |       | Ca <sup>2+</sup> |       | Mg <sup>2+</sup> |       |
|---------------|--------------------|-------|------|-------|------|-------|------|-------|--------------------|-------|------------------|-------|------------------|-------|
|               | CV                 | cQ    | CV   | cQ    | CV   | cQ    | CV   | cQ    | CV                 | cQ    | CV               | cQ    | CV               | cQ    |
| Aar           | 1.06               | 0.54  | 0.39 | -0.41 | 0.35 | -0.22 | 0.38 | 0.10  | 0.22               | 0.22  | 0.26             | -0.40 | 0.18             | -0.27 |
| Aisch         | 0.57               | 0.43  | 0.31 | -0.03 | 0.23 | 0.03  | 0.31 | 0.23  | 0.23               | 0.21  | 0.12             | -0.15 | 0.11             | -0.14 |
| Alf           | 0.67               | 0.07  | 0.58 | -0.49 | 0.47 | -0.33 | 0.34 | 0.15  | 0.30               | 0.26  | 0.28             | -0.21 | 0.21             | -0.24 |
| Alsenz        | 1.76               | 0.42  | 0.36 | -0.28 | 0.47 | -0.13 | 0.49 | 0.25  | 0.24               | 0.21  | 0.11             | -0.10 | 0.13             | -0.14 |
| Appelbach     | 3.58               | 0.20  | 0.67 | -0.30 | 1.07 | -0.13 | 1.83 | 0.29  | 0.36               | 0.15  | 0.23             | -0.16 | 0.29             | -0.19 |
| Breg          | 0.63               | 0.17  | 0.31 | -0.08 |      |       |      |       | 0.14               | 0.01  | 0.19             | -0.21 | 0.23             | -0.10 |
| Brigach       | 2.05               | 0.22  | 0.61 | -0.32 | 0.27 | 0.10  |      |       | 0.34               | -0.31 | 0.34             | -0.30 | 0.29             | -0.35 |
| Doersbach     | 1.50               | 0.33  | 0.60 | -0.45 | 0.57 | -0.33 | 0.55 | 0.07  | 0.33               | 0.25  | 0.14             | -0.15 | 0.13             | -0.13 |
| Donau         | 0.58               | 0.13  | 0.45 | 0.06  | 0.41 | 0.09  | 0.22 | -0.11 | 0.12               | 0.02  | 0.11             | -0.01 | 0.13             | -0.05 |
| Eger          | 1.10               | 0.15  | 0.55 | 0.24  | 0.90 | 0.86  |      |       | 0.35               | 0.31  | 0.10             | -0.16 | 0.12             | -0.16 |
| Enz           | 0.49               | 0.23  | 0.44 | -0.25 | 0.63 | 0.02  | 0.73 | 0.28  | 0.19               | 0.12  | 0.23             | -0.23 | 0.19             | -0.21 |
| Erlenbach     | 1.54               | 0.32  | 0.76 | 0.03  | 0.59 | 0.20  | 0.50 | 0.29  | 0.34               | -0.02 | 0.22             | -0.11 | 0.23             | -0.15 |
| Erms          | 3.97               | -0.15 | 2.38 | -0.55 | 0.48 | -0.37 | 1.23 | 0.49  | 0.31               | -0.09 | 0.10             | -0.01 | 0.44             | -0.13 |
| Fils          | 1.47               | 0.07  | 0.80 | -0.38 | 0.69 | -0.01 | 0.53 | 0.18  | 0.29               | -0.14 | 0.10             | -0.08 | 0.21             | -0.19 |
| Glan          | 1.13               | 0.61  | 0.30 | -0.42 | 0.25 | -0.21 | 0.23 | 0.17  | 0.17               | 0.07  | 0.10             | -0.09 | 0.10             | -0.06 |
| Hahnenbach    | 1.14               | 0.26  | 0.77 | -0.40 | 0.64 | -0.23 | 0.28 | 0.08  | 0.36               | 0.35  | 0.11             | -0.04 | 0.11             | -0.06 |
| Hornbach      | 0.66               | 0.40  | 0.48 | -0.17 | 0.34 | 0.08  | 0.54 | 0.43  | 0.33               | 0.16  | 0.14             | 0.09  | 0.15             | 0.02  |
| Jagst         | 0.81               | 0.32  | 0.35 | 0.13  | 0.33 | 0.17  | 0.27 | 0.17  | 0.40               | 0.56  | 0.13             | -0.17 | 0.12             | -0.15 |
| Kammell       | 1.43               | 0.76  | 0.42 | -0.04 | 0.75 | 0.33  | 0.72 | 0.54  | 0.21               | 0.02  | 0.16             | -0.25 | 0.20             | -0.38 |
| Kocher        | 0.71               | 0.35  | 0.42 | 0.00  | 0.34 | 0.10  | 0.39 | 0.25  | 0.25               | 0.25  | 0.17             | -0.23 | 0.16             | -0.20 |
| Loisach       | 1.79               | -0.44 | 1.92 | -0.33 | 1.73 | 0.35  | 0.88 | 0.39  | 0.31               | -0.22 | 0.17             | -0.18 | 0.19             | -0.22 |
| Naab          | 1.30               | 0.50  | 0.83 | -0.21 | 0.64 | 0.02  | 0.40 | 0.24  | 0.31               | 0.26  | 0.20             | -0.25 | 0.29             | -0.38 |
| Nahe          | 0.91               | 0.06  | 0.39 | -0.42 | 0.35 | -0.33 | 0.14 | -0.16 | 0.18               | 0.04  | 0.15             | -0.19 | 0.16             | 0.06  |
| Neckar        | 1.07               | 0.20  | 0.57 | -0.39 | 0.47 | -0.33 | 0.38 | 0.22  | 0.19               | -0.17 | 0.17             | -0.21 | 0.19             | -0.25 |
| Nette         | 1.15               | 0.39  | 0.66 | -0.80 | 0.73 | -0.30 | 0.54 | -0.13 | 0.25               | -0.04 | 0.44             | -0.53 | 0.34             | -0.36 |
| Pfrimm        | 2.14               | 0.67  | 0.64 | 0.09  | 0.74 | 0.28  | 0.55 | 0.42  | 0.25               | -0.19 | 0.18             | -0.18 | 0.19             | -0.21 |
| Queich        | 1.62               | 0.76  | 0.65 | -0.23 | 0.57 | 0.04  | 0.47 | 0.12  | 0.43               | 0.03  | 0.28             | -0.22 | 0.21             | -0.08 |
| Rems          | 1.49               | 0.19  | 0.66 | -0.20 | 0.47 | 0.23  |      |       | 0.23               | -0.08 | 0.20             | -0.25 | 0.25             | -0.35 |
| Ruwer         | 0.95               | -0.09 | 0.61 | -0.50 | 0.88 | -0.33 | 0.35 | 0.05  | 0.20               | 0.15  | 0.14             | -0.13 | 0.11             | -0.11 |
| Schutter      | 1.38               | 0.14  | 0.50 | 0.10  |      |       |      |       | 0.20               | 0.07  | 0.18             | -0.27 | 0.38             | -0.48 |
| Schwarzach    | 1.03               | 0.41  | 0.50 | -0.17 | 0.50 | -0.06 | 0.39 | 0.07  | 0.39               | 0.32  | 0.08             | 0.02  | 0.08             | -0.03 |
| Schwarzbach   | 1.29               | 0.30  | 0.71 | -0.17 | 0.68 | 0.15  | 1.16 | 0.61  | 0.49               | 0.21  | 0.22             | 0.15  | 0.22             | 0.12  |
| Selz          | 2.84               | 0.61  | 0.62 | -0.13 | 0.69 | -0.20 | 0.47 | 0.08  | 0.59               | 0.30  | 0.28             | -0.03 | 0.44             | 0.08  |
| Simmerbach    | 1.50               | 0.50  | 0.43 | -0.43 | 0.59 | -0.28 | 0.24 | 0.13  | 0.30               | 0.30  | 0.09             | -0.06 | 0.08             | -0.06 |
| Speyerbach    | 3.35               | 0.36  | 1.09 | -0.01 | 0.91 | 0.02  | 0.79 | 0.34  | 0.63               | 0.00  | 0.73             | 0.35  | 0.71             | 0.43  |
| Tauber        | 1.12               | 0.49  | 0.40 | -0.24 | 0.48 | -0.15 |      |       | 0.20               | 0.16  | 0.14             | -0.17 | 0.11             | -0.10 |
| TirolerAchen  | 1.03               | -0.29 | 1.26 | -0.43 | 2.40 | 0.53  | 1.43 | 0.47  | 0.27               | -0.18 | 0.19             | -0.22 | 0.20             | -0.24 |
| Vils          | 0.91               | 0.76  | 0.56 | 0.33  | 0.50 | 0.35  | 0.44 | 0.34  | 0.35               | 0.39  | 0.11             | -0.10 | 0.13             | -0.22 |
| Wiesbach      | 1.43               | -0.30 | 0.28 | -0.14 | 0.84 | -0.34 | 0.70 | 0.23  | 0.44               | -0.05 | 0.31             | -0.10 | 0.42             | -0.13 |
| Wolfegger Ach | 1.68               | 0.60  | 0.75 | 0.40  | 0.58 | 0.94  |      |       | 0.21               | -0.07 | 0.18             | -0.15 | 0.21             | -0.28 |

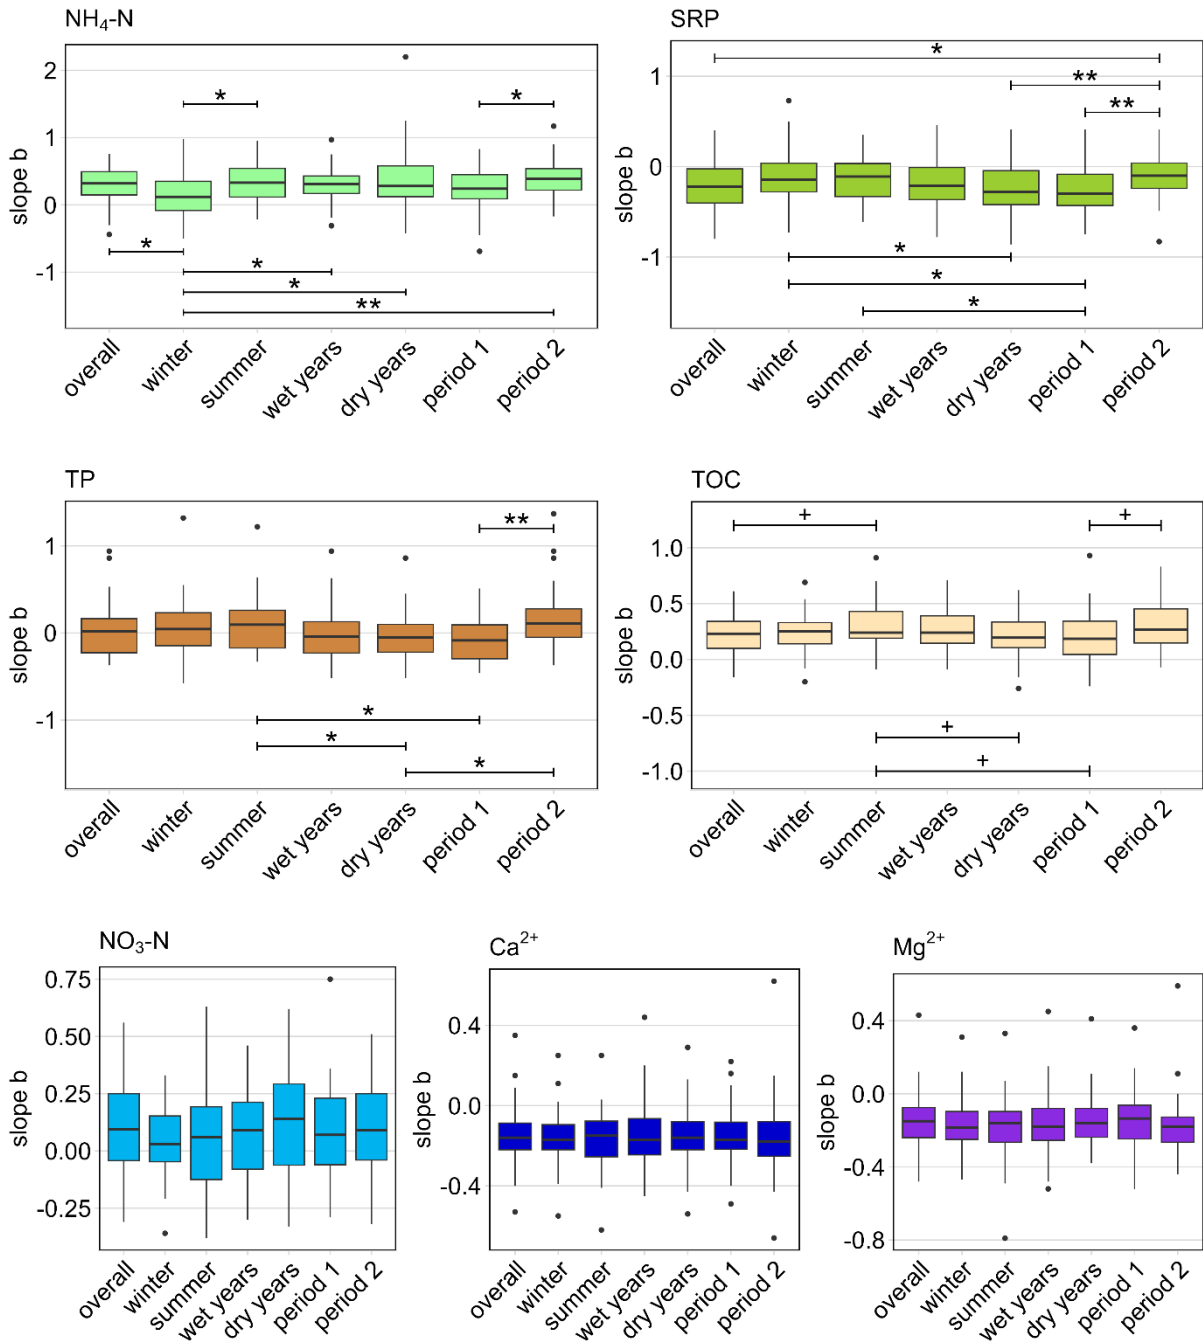

Figure S1: Boxplots of slope b for NH<sub>4</sub>-N, SRP, TP, TOC, NO<sub>3</sub>-N and Ca<sup>2+</sup> (Ca) across different periods (overall, winter, summer, wet years, dry years, period 1, period 2). Significant differences were tested using the Kruskal-Wallis test and corrected by Bonferroni correction (<sup>+</sup><0.1, \*<0.05, \*\*<0.01).

**Table S5: Relationships between land-use changes from 2006 to 2018 and changes in cQ-relationship ( $\Delta$  slope b) for multiple water quality parameters. Correlation analyses were performed using the Pearson or Spearman method, depending on the distribution of the variables. Pearson correlations were applied exclusively when variables satisfied normality requirements. Normality was evaluated using the Shapiro–Wilk test ( $p > 0.05$ ). Correlation coefficients, p-values, and sample sizes (n) are documented. Negative values indicate a decrease in cQ-slope or land-use share, while positive values indicate an increase.**

| Parameter | Landuse                  | slope b                             | Method   | Correlation coefficient | p-value | n  |
|-----------|--------------------------|-------------------------------------|----------|-------------------------|---------|----|
| NO3       | $\Delta$ Forest [%]      | $\Delta$ slope b - NO <sub>3</sub>  | pearson  | 0.00                    | 0.980   | 35 |
| NO3       | $\Delta$ Pastures [%]    | $\Delta$ slope b - NO <sub>3</sub>  | pearson  | 0.05                    | 0.794   | 35 |
| NO3       | $\Delta$ Arable Land [%] | $\Delta$ slope b - NO <sub>3</sub>  | pearson  | 0.04                    | 0.841   | 35 |
| NO3       | $\Delta$ Urban Area [%]  | $\Delta$ slope b - NO <sub>3</sub>  | spearman | -0.14                   | 0.419   | 35 |
| NH4       | $\Delta$ Forest [%]      | $\Delta$ slope b - NH <sub>4</sub>  | spearman | 0.06                    | 0.734   | 35 |
| NH4       | $\Delta$ Pastures [%]    | $\Delta$ slope b - NH <sub>4</sub>  | spearman | -0.16                   | 0.353   | 35 |
| NH4       | $\Delta$ Arable Land [%] | $\Delta$ slope b - NH <sub>4</sub>  | spearman | 0.29                    | 0.087   | 35 |
| NH4       | $\Delta$ Urban Area [%]  | $\Delta$ slope b - NH <sub>4</sub>  | spearman | -0.28                   | 0.101   | 35 |
| Pges      | $\Delta$ Forest [%]      | $\Delta$ slope b - TP               | spearman | -0.24                   | 0.228   | 27 |
| Pges      | $\Delta$ Pastures [%]    | $\Delta$ slope b - TP               | spearman | 0.15                    | 0.455   | 27 |
| Pges      | $\Delta$ Arable Land [%] | $\Delta$ slope b - TP               | spearman | -0.09                   | 0.645   | 27 |
| Pges      | $\Delta$ Urban Area [%]  | $\Delta$ slope b - TP               | spearman | -0.23                   | 0.250   | 27 |
| oP        | $\Delta$ Forest [%]      | $\Delta$ slope b - SRP              | pearson  | -0.39                   | 0.019   | 35 |
| oP        | $\Delta$ Pastures [%]    | $\Delta$ slope b - SRP              | pearson  | 0.24                    | 0.164   | 35 |
| oP        | $\Delta$ Arable Land [%] | $\Delta$ slope b - SRP              | pearson  | -0.03                   | 0.859   | 35 |
| oP        | $\Delta$ Urban Area [%]  | $\Delta$ slope b - SRP              | spearman | -0.04                   | 0.832   | 35 |
| Ca        | $\Delta$ Forest [%]      | $\Delta$ slope b - Ca <sup>2+</sup> | spearman | -0.02                   | 0.924   | 30 |
| Ca        | $\Delta$ Pastures [%]    | $\Delta$ slope b - Ca <sup>2+</sup> | spearman | -0.08                   | 0.694   | 30 |
| Ca        | $\Delta$ Arable Land [%] | $\Delta$ slope b - Ca <sup>2+</sup> | spearman | 0.26                    | 0.172   | 30 |
| Ca        | $\Delta$ Urban Area [%]  | $\Delta$ slope b - Ca <sup>2+</sup> | spearman | -0.44                   | 0.015   | 30 |
| Mg        | $\Delta$ Forest [%]      | $\Delta$ slope b - Mg <sup>2+</sup> | pearson  | 0.11                    | 0.577   | 30 |
| Mg        | $\Delta$ Pastures [%]    | $\Delta$ slope b - Mg <sup>2+</sup> | pearson  | -0.20                   | 0.285   | 30 |
| Mg        | $\Delta$ Arable Land [%] | $\Delta$ slope b - Mg <sup>2+</sup> | pearson  | 0.27                    | 0.145   | 30 |
| Mg        | $\Delta$ Urban Area [%]  | $\Delta$ slope b - Mg <sup>2+</sup> | spearman | -0.66                   | 0.000   | 30 |
| TOC       | $\Delta$ Forest [%]      | $\Delta$ slope b - TOC              | pearson  | -0.27                   | 0.185   | 26 |
| TOC       | $\Delta$ Pastures [%]    | $\Delta$ slope b - TOC              | pearson  | 0.22                    | 0.286   | 26 |
| TOC       | $\Delta$ Arable Land [%] | $\Delta$ slope b - TOC              | pearson  | -0.20                   | 0.338   | 26 |
| TOC       | $\Delta$ Urban Area [%]  | $\Delta$ slope b - TOC              | spearman | -0.02                   | 0.916   | 26 |
